1 **Temporal inhibition of chromatin looping and enhancer accessibility during neuronal**  
2 **remodeling**

3 Dahong Chen<sup>1,2</sup>, Catherine E. McManus<sup>1,2</sup>, Behram Radmanesh<sup>3</sup>, Leah H. Matzat<sup>1,3</sup>, and Elissa P.  
4 Lei<sup>1,2\*</sup>

5 <sup>1</sup>Nuclear Organization and Gene Expression Section, Bethesda, MD, USA

6 <sup>2</sup>Laboratory of Biochemistry and Genetics, National Institute of Diabetes and Digestive and Kidney  
7 Diseases, National Institutes of Health, 9000 Rockville Pike, Bethesda, MD, 20892, USA.

8 <sup>3</sup>Laboratory of Cellular and Developmental Biology, National Institute of Diabetes and Digestive  
9 and Kidney Diseases, National Institutes of Health, 9000 Rockville Pike, Bethesda, MD, USA.

10

11 \*Correspondence to: [leielissa@niddk.nih.gov](mailto:leielissa@niddk.nih.gov)

12

13 **ABSTRACT**

14 During development, looping of an enhancer to a promoter is frequently observed in  
15 conjunction with temporal and tissue-specific transcriptional activation. The chromatin insulator-  
16 associated protein Shep promotes *Drosophila* post-mitotic neuronal remodeling by repressing  
17 transcription of master developmental regulators, such as *brain tumor (brat)*, specifically in  
18 maturing neurons. Since insulator proteins can promote looping, we hypothesized that Shep  
19 antagonizes *brat* promoter interaction with an as yet unidentified enhancer. Using chromatin  
20 conformation capture and reporter assays, we identified two novel enhancer regions that increase in  
21 looping frequency with the *brat* promoter specifically in pupal brains after Shep depletion. The *brat*

1 promoters and enhancers function independently of Shep, ruling out direct repression of these  
2 elements. Moreover, ATAC-seq in isolated neurons demonstrated that Shep restricts chromatin  
3 accessibility of a key *brat* enhancer as well as other enhancers genome-wide in remodeling pupal  
4 but not larval neurons. These enhancers are enriched for chromatin targets of Shep and are located  
5 at Shep-inhibited genes, suggesting direct Shep inhibition of enhancer accessibility and gene  
6 expression during neuronal remodeling. Our results provide evidence for temporal regulation of  
7 chromatin looping and enhancer accessibility during neuronal maturation.

8

9 **Keywords: enhancer-promoter looping, chromatin accessibility, neuronal remodeling, Shep,**  
10 **anti-looping**

11

## 12 **INTRODUCTION**

13 Establishment and maintenance of proper chromatin topology has emerged as an essential  
14 and conserved feature of exquisitely tuned, developmentally regulated gene expression programs.  
15 On the finest scale, looping between an enhancer and a promoter (E-P looping) is frequently  
16 observed during or even before the onset of developmentally programmed transcriptional  
17 activation<sup>1,2</sup>. In fact, forced E-P looping can result in ectopic activation of gene expression<sup>3,4</sup>,  
18 suggesting that the E-P looping step itself may serve as a point of either positive or negative  
19 regulation during development. One such E-P loop-promoting factor is the Lim domain-containing  
20 protein Ldb1, which is expressed during the development of specific tissues and forms a complex  
21 with particular transcription factors<sup>5</sup>. Although perturbation of transcription factors may indirectly  
22 affect E-P loop formation by affecting transcription<sup>6-8</sup>, no such dedicated antagonist of E-P looping

1 has yet been identified. Furthermore, regulation of chromatin 3D structure during post-mitotic  
2 neuronal remodeling has not previously been studied.

3 Architectural proteins, such as insulator proteins, have been demonstrated to participate in  
4 the formation of topologically associating domains and cell type-specific E-P loops. The first tissue-  
5 specific regulator of insulator activity to be identified is the *Drosophila* RNA-binding protein Alan  
6 Shepard (Shep), which acts as an insulator antagonist only in the nervous system<sup>9,10</sup>. Shep is  
7 required for neuronal remodeling, an essential and conserved process that replaces juvenile neuronal  
8 projections with adult-specific projections during the metamorphic transition between larval and  
9 pupal development. Shep functions in part by repressing transcription of a key neuronal remodeling  
10 inhibitor, *brat*, specifically in pupal neurons<sup>11-13</sup>. Shep associates with the chromatin of *brat* and  
11 many other target genes<sup>11</sup>, frequently at promoters<sup>10</sup>. We therefore speculated that Shep may  
12 antagonize *brat* E-P looping in order to repress its transcription during post-mitotic neuronal  
13 remodeling.

14

## 15 **RESULTS**

### 16 **Shep inhibits *brat* promoter looping with proximal genomic regions**

17 In order to survey Shep-dependent *brat* promoter looping, we performed Circularized  
18 Chromosome Conformation Capture (4C-seq) in central nervous system-derived BG3 cultured cells.  
19 Shep inhibits transcription of all *brat* isoforms in BG3 cells and pupal neurons (Fig. 1A-C), and  
20 ChIP-seq of Shep indicates chromatin association within the immediate vicinity of each of the  
21 annotated *brat* promoters<sup>11</sup> (Fig. 1A). Since *brat-F* is the dominant isoform in pupal neurons<sup>11</sup> (Fig.  
22 1A), a validated Shep chromatin binding site at the *brat-F* promoter (Fig. S1) was selected as an  
23 anchor to generate 4C-seq libraries (Fig. 1A). Upon efficient knockdown of Shep (Fig. 1D), we

1 identified two regions within 30 kb of the anchor that display statistically increased interaction with  
2 the *brat-F* promoter (Fig. 1A and E, regions 1 and 3) as well as a third region with decreased  
3 interaction frequency (region 2). We hypothesized that these regions could harbor *cis*-regulatory  
4 elements, such as enhancers, that loop to the *brat-F* promoter to activate its expression.  
5 Furthermore, we speculate that Shep may antagonize these putative E-P looping interactions in a  
6 temporally-regulated manner.

7

### 8 **Shep inhibits *brat* promoter looping to a neural enhancer**

9 We observed that all three differentially interacting 4C-seq regions are covered by histone  
10 post-translational modifications associated with enhancer activity. Examination of publicly  
11 available H3K4me1, H3K27ac, and STARR-seq profiles in BG3 cells<sup>14,15</sup> provided evidence that  
12 these regions may function as enhancers to regulate *brat* transcription (Fig. 2A). In order to test this  
13 possibility, we cloned each of the three putative enhancer regions juxtaposed to the *brat-F* promoter  
14 upstream of a firefly luciferase reporter (Fig. 2B) to assay luciferase activity driven by these  
15 constructs or by the *brat-F* promoter alone. We found that only region 1 preceding the *brat-F*  
16 promoter is able to increase reporter expression in BG3 relative to control constructs (Fig. 2C),  
17 whereas region 1 alone does not support substantial luciferase expression (Fig. S2A-B).  
18 Interestingly, none of the constructs are able to enhance *brat-F*-dependent expression when  
19 transfected into S2 cells, a non-neural cell type (Fig. 2D and S2C), indicating that region 1 is a cell  
20 type-specific enhancer.

21 We next tested whether Shep affects luciferase expression in this artificial context, in which  
22 the region 1 enhancer is juxtaposed to the *brat-F* promoter. We repeated the reporter assays with the  
23 *brat-F* promoter alone, juxtaposed to the region 1 enhancer, or the region 1 enhancer alone in

1 control versus Shep-depleted cells. Importantly, no significant differences were observed in control  
2 versus Shep-depleted cells for any of these constructs, indicating that Shep does not directly affect  
3 either *brat-F* promoter or region 1 enhancer activities (Fig. 2E). Since Shep associates with regions  
4 at or nearby promoters of other *brat* isoforms as well, we also performed reporter assays to test  
5 Shep regulation of *brat-A/E* or *brat-B/C* promoters with or without region 1. While region 1 can  
6 activate both promoters, depletion of Shep does not affect activity of either promoter, indicating that  
7 each of these elements also functions independently of Shep in this artificial context (Fig. 2F and  
8 G). These key results suggest that Shep does not simply act as a transcriptional repressor of either  
9 enhancer or promoter activities. Taken together, we conclude that Shep repression of *brat* only  
10 occurs in the *in vivo* context, in which we hypothesize that Shep-mediated antagonism of E-P  
11 looping in pupae attenuates *brat-F* expression.

12

### 13 **Shep inhibits neural *brat* promoter-enhancer looping in a stage-specific manner**

14 In order to further test this hypothesis, we next asked whether Shep inhibits *brat-F* promoter  
15 looping with the region 1 enhancer *in vivo* in a stage-specific manner. We performed directed 3C  
16 using Taqman qPCR to quantify looping between the *brat-F* promoter anchor and the surrounding  
17 vicinity, including regions 1-3, in isolated control pupal brains versus brains harboring neurons  
18 depleted of Shep (*elav>Dcr-2, shep-RNAi, mCD8::GFP*) (Fig. 3A). Consistent with our 4C-seq  
19 results in BG3 cells (Fig. 1A), we found increased looping in Shep-depleted pupal brains between  
20 the *brat-F* promoter and the region 1 enhancer as well as a flanking region, which we named region  
21 4 (Fig. 3A). In contrast, larval brains show no statistically significant differences for *brat-F*  
22 promoter interaction frequencies with regions 1 and 4, with low looping interactions in both control  
23 and Shep-depleted flies. Interaction frequencies in both larvae and pupae are also low between the

1 *brat-F* promoter and other sites examined, including regions 2 and 3. We further interrogated  
2 looping in pupal brains using the *brat-B/C* promoter as an anchor but found very low levels of  
3 looping with regions 1 and 4 relative to looping observed with the *brat-F* promoter (Fig. S3),  
4 demonstrating a correlation between low looping frequency and low expression of *brat-B/C*.  
5 Moreover, Shep depletion in pupal brains has no effect on looping of regions 1 and 4 with the *brat-*  
6 *B/C* promoter (Fig. S3). Examination of Shep chromatin association in the larval brain revealed that  
7 Shep does associate with chromatin at the *brat-F* promoter as well as regions 1 and 4 (Fig. 3A),  
8 suggesting direct function at these sites. Given that Shep inhibits *brat* expression in neurons  
9 specifically at the pupal stage, our results provide strong evidence for Shep inhibition specifically of  
10 *brat-F* looping with enhancer regions 1 and 4 in a temporal manner.

11

#### 12 **Region 4 functions as a pupal enhancer *in vivo***

13 We thus suspected that both regions 1 and 4 may act as enhancers *in vivo*, so we cloned  
14 regions 1 and 4 individually juxtaposed to the *hsp70* promoter upstream of a GFP reporter to test  
15 their ability to activate transcription in flies. We inserted these constructs into the *attP40* docking  
16 site using *PhiC31* integrase in order to assay GFP expression driven by regions 1 or 4 compared to  
17 the *hsp70* promoter alone. We observed that region 4 strongly activates GFP expression specifically  
18 in pupal but not larval brains (Fig. 3D and G). To test its *in vivo* activity, we CRISPR-deleted the  
19 region 4 enhancer in flies and observed reduction of *brat-F* expression in pupal brains (Fig. 3H),  
20 indicating a critical function for region 4 as an enhancer of *brat* transcription at this stage. On the  
21 other hand, region 1 enhances *hsp70* promoter-driven GFP expression only in larval but not pupal  
22 brains (Fig. 3C and F). Consistent with the luciferase reporter assays in BG3 cells, enhancer  
23 activities of regions 1 and 4 were unchanged in strong loss-of-function Shep mutant brains (Fig.

1 S4A-D), indicating that Shep does not simply repress enhancer activities. In conclusion, both  
2 regions 1 and 4 function as *brat* enhancers *in vivo*, in larvae and pupae respectively, and Shep  
3 cannot directly repress the activity of either enhancer. These results are consistent with the  
4 hypothesis that Shep functions as an antagonist of E-P looping in order to negatively regulate *brat*  
5 transcription at the pupal stage.

6

### 7 **Shep inhibits chromatin accessibility of the region 4 enhancer in pupal neurons**

8 In order to gain insight into the mechanism by which *brat* E-P looping is regulated by Shep,  
9 we performed ATAC-seq to examine chromatin accessibility in control versus Shep-depleted  
10 neurons. To this end, neurons from control larvae or pupae were GFP-labeled (*elav>Dcr-2*,  
11 *mCD8::GFP*) and FACS-isolated for Omni-ATAC-seq analyses<sup>16</sup>. Consistent with overall  
12 decreased expression between larval and pupal stages in control neurons, chromatin accessibility of  
13 *brat* overall is also strongly reduced during this developmental transition (Fig. 4A). In contrast,  
14 chromatin accessibility increases at the *brat-F* promoter in pupae, perhaps related to primary use of  
15 this promoter at the pupal stage. Importantly, in pupal but not larval neurons (Fig. 4A and Table  
16 S1), Shep depletion leads to elevated accessibility both in the vicinity of the *brat-F* promoter and at  
17 the region 4 enhancer. These results indicate close correspondence between Shep inhibition of  
18 chromatin accessibility and Shep inhibition of *brat* E-P looping and transcription in pupae.

19

### 20 **Shep facilitates developmental closing of putative enhancers**

21 Our ATAC-seq profiles enabled us to identify developmentally programmed changes in  
22 chromatin accessibility of larval versus pupal control neurons genome-wide, beyond the *brat* locus.  
23 The majority of ATAC-seq peaks (33,882 of 41,568) display differential accessibility between

1 control larval and pupal neurons, resulting in 17,367 opening and 16,515 closing regions over this  
2 time window. In order to determine whether accessibility changes occur at enhancers genome-wide  
3 during neuronal remodeling, we performed CUT&Tag of H3K4me1 on FACS-sorted control larval  
4 and pupal neurons (*elav>Dcr-2, mCD8::GFP*) to identify all putative enhancers irrespective of  
5 activity. Intersection between ATAC-seq and CUT&Tag profiles indicates that 70% (24,155 out of  
6 33,882) of temporal accessibility changes occur at H3K4me1 regions, suggesting that enhancers are  
7 particularly malleable during this developmental window. Furthermore, 86% (7,353 out of 8,528) of  
8 H3K4me1 regions change in accessibility during neuronal remodeling. Therefore, widespread  
9 temporal regulation of accessibility at enhancer regions is observed during neuronal remodeling.

10       Upon genome-wide examination of Shep-dependent differentially accessible regions, we  
11 found strong Shep-facilitated enhancer closing during neuronal remodeling. Overall, chromatin  
12 accessibility in Shep-depleted neurons shows substantially more changes in pupae (3,147  
13 differential regions) than in larvae (331), consistent with pupal-specific transcriptome changes upon  
14 Shep depletion<sup>11</sup>. Considering only Shep-dependent accessibility changes in pupal neurons, we  
15 found 1,127 regions labeled by H3K4me1 that are normally kept inaccessible by Shep (Shep-  
16 inhibited). During normal neuronal development, these regions are accessible in larvae but become  
17 closed by the pupal stage (Fig. 4B and C). However, in Shep-depleted neurons, these regions gain  
18 additional accessibility in pupal compared to larval neurons, indicating greatly compromised  
19 closing of these putative enhancers. Intriguingly, these regions are most enriched for binding motifs  
20 for the zinc finger DNA-binding proteins, Klu transcription factor and GAGA-factor (GAF) (Fig.  
21 S4E and F), a protein that has been implicated in insulator activity<sup>17,18</sup>. While many enhancer  
22 regions failed to close during neuronal remodeling in the absence of Shep, we also identified 1,333  
23 Shep-promoted regions labeled by H3K4me1 that are inaccessible in larval neurons but open during



1 normal neuronal remodeling. Upon Shep depletion, these regions can only be partially opened,  
2 suggesting that Shep moderately contributes to the accessibility of these regions (Fig. 4B and D).  
3 For these regions, we obtained enrichment for motifs for Klu and the Sp1 family of transcription  
4 factors<sup>19</sup> (Fig. S4F). By performing CUT&Tag of H3K27me3 with sorted control neurons from  
5 pupae, we observed more frequent Shep regulation of accessibility in either direction of H3K4me1-  
6 labeled enhancers (2,560) than H3K27me3-labeled inactive chromatin regions (1,305), despite  
7 similar genomic coverage by H3K4me1 (4.1e7 bp) and H3K27me3 (3.8e7 bp), indicating enhancer-  
8 biased Shep regulation of accessibility. Taken together, we conclude that Shep mainly mediates  
9 closing of numerous enhancers genome-wide during neuronal remodeling.

10 Finally, we verified that Shep-dependent changes in chromatin accessibility are functionally  
11 associated with gene expression changes genome-wide. *Myc*, another key downstream target that is  
12 repressed by Shep in pupal neurons<sup>11,20</sup>, displays temporally dynamic accessibility patterns at  
13 H3K4me1-enriched regions, some of which are also Shep-inhibited (Fig. S5A). Genome-wide, we  
14 found that Shep-inhibited accessibility changes are indeed statistically enriched for Shep-inhibited  
15 gene expression changes in pupal neurons (Fig. S5B). Statistically significant association between  
16 these two events is even more pronounced when restricted to H3K4me1-marked accessibility  
17 changes (Fig. 4E), suggesting that genome-wide enhancer closure is a key mechanistic step in  
18 transcriptional inhibition mediated by Shep. Among 82 genes inhibited by Shep for both expression  
19 and enhancer accessibility, Shep association is significantly enriched at enhancers of 26 genes  
20 (Fisher's exact test (FET),  $p=1.7e-8$ , odds ratio=4.5), suggesting direct Shep inhibition of both  
21 enhancer accessibility and transcription. In contrast, correlation between Shep-promoted gene  
22 expression and Shep-regulated accessibility is either weaker (Fig. S5C and D) or absent (Fig. 4E;  
23 Fig. S5B) when enhancers are considered. These findings suggest that Shep inhibits chromatin

1 accessibility, particularly enhancer accessibility, to temporally regulate gene expression during  
2 neuronal remodeling.

3

#### 4 **DISCUSSION**

5 Shep attenuates transcription of a critical developmental regulator during a specific window  
6 of neuronal remodeling by inhibiting E-P looping, which is itself dynamically controlled. Genome-  
7 wide, Shep reduces transcription of many downstream targets and limits chromatin accessibility of  
8 corresponding enhancer regions during neuronal remodeling. Although several transcription factors  
9 have been shown to inhibit E-P loop formation<sup>6-8</sup>, loss of looping in these cases is likely an indirect  
10 result of repressed enhancer and/or promoter activities. In these studies and our own work, it  
11 remains a challenge to distinguish between cause and consequence; however, we demonstrated that  
12 Shep does not alter the ability of *brat* enhancers or promoters to drive a reporter either *ex vivo* or *in*  
13 *vivo*. Thus, we propose that Shep is a dedicated anti-looping factor, which functions primarily by  
14 inhibiting E-P looping to regulate *brat* expression.

15 We speculate that Shep antagonism of E-P looping involves regulation of other DNA-  
16 binding proteins with respect to their chromatin association, as evidenced by changes of chromatin  
17 accessibility at enhancers. Our motif analysis of Shep-regulated enhancers identified Klu and the  
18 Sp1 family of transcription factors, two classes of zinc-finger proteins that are both enriched in the  
19 nervous system during metamorphosis<sup>14</sup> when neuronal remodeling occurs. We also identified  
20 enrichment of a GA-rich motif known to be bound by the insulator-associated factor GAF, and this  
21 motif is present in the region 4 enhancer. Although GAF is an attractive candidate considering that  
22 it binds the *brat-F* promoter as well as enhancer regions 1 and 4 in chromatin of BG3 cells (Fig.  
23 S4G), the GA-rich motifs identified in our analyses are fairly generic repeated sequences that could

1 alternatively be bound by other factors, such as CLAMP<sup>21</sup> or AGO2<sup>22</sup>, for example. Future studies  
2 are required to interrogate the potential roles of these proteins in Shep mechanistic function. In  
3 addition, Shep is known to bind transcripts of its chromatin target genes<sup>11,23</sup>, raising the possibility  
4 that Shep may load onto chromatin during transcription and concomitantly regulate chromatin  
5 accessibility and E-P looping. Finally, specific coding or non-coding RNAs could be required for  
6 Shep function in this context, as RNA-binding is required for Shep antagonism of *gypsy* insulator  
7 activity<sup>9</sup>. Our results do not rule out the possibility that Shep also downregulates *brat* or other genes  
8 by posttranscriptional mechanisms. Given widespread evidence that E-P looping and enhancer  
9 accessibility are both frequently associated with gene activation, we predict that regulation of  
10 chromatin looping and enhancer accessibility are commonly utilized cellular mechanisms to control  
11 developmental gene expression programs.

12 Notably, our results provide the first evidence of temporal regulation of 3D chromatin  
13 organization that facilitates post-mitotic neuronal remodeling. Previous studies in *Drosophila* have  
14 identified a variety of genetic and cellular processes underlying neuronal remodeling<sup>12,20,24</sup>, and  
15 recent studies have begun to elucidate transcriptome dynamics throughout this developmental  
16 program<sup>11,25</sup>. However, fundamental mechanisms regulating 3D chromatin structure that result in  
17 temporal changes in gene expression during this essential process in any model system remain  
18 undefined. Our data reveal highly dynamic enhancer accessibility during normal neuronal  
19 maturation, similar to what has been observed during developmental differentiation in the mouse  
20 cerebellum<sup>26</sup>, suggesting conserved regulation of enhancer accessibility during neuronal maturation.  
21 We found that Shep inhibits enhancer accessibility during the temporal progression of neuronal  
22 remodeling, which corresponds to Shep chromatin association, Shep repression of chromatin  
23 looping, and temporal inhibition of the key target *brat* gene. Moderate expression changes of all

1 *brat* isoforms as well as *brat* enhancer accessibility may result from changes occurring only in  
2 specific neurons within the total isolated population and/or transient changes in chromatin  
3 accessibility. Since we and others have observed that E-P looping is not necessarily sufficient to  
4 activate transcription<sup>27</sup>, it is likely that additional chromatin-related events must occur in order to  
5 achieve transcriptional activation. Widespread and conserved dynamics of enhancer accessibility is  
6 observed in the nervous system across organisms<sup>26,28,29</sup>; likewise, regulated E-P looping may also be  
7 utilized genome-wide during neuronal remodeling to regulate temporal gene expression. Finally,  
8 our findings suggest potential mechanisms underlying functions of human Shep orthologs, of which  
9 mutation and misexpression are associated with various neurological diseases, including ALS,  
10 Alzheimer's, Parkinson's, and schizophrenia<sup>30</sup>.

11

## 1 **Materials and Methods**

### 2 Fly strains

3 Fly stocks and crosses were grown on standard cornmeal-yeast-agarose medium at 25°C. Only  
4 female animals were used for experiments. Fly strains used include *elav-Gal4* (FBst0000458), *UAS-*  
5 *Dcr-2* (FBst0024650), and *UAS-shep-RNAi* (FBst0462204). For generation of the *phsp70*-GFP  
6 strains, region 1 or 4 was cloned into NotI restriction sites in the pEGFP-attB plasmid (*Drosophila*  
7 Genomics Resource Center). The resulting plasmids were integrated by *phiC31* integrase at the  
8 *attP40* locus by BestGene. To generate flies deleted for region 4 using CRISPR/Cas9 editing, two  
9 gRNAs CACTGTGCCAGAAAGTTCCA and AATGCACTGATTAACAGTAA were inserted into  
10 the BbsI sites of the plasmid pUC57 (a gift from B. Oliver, NIDDK) for gRNA expression after  
11 embryo injection. To delete endogenous region 4, genomic sequences flanking region 4 were  
12 inserted on either side of dsRed coding sequence into the plasmid pUC19 (a gift from B. Oliver,  
13 NIDDK) as a homologous repair template. Both plasmids were constructed by GenScript and were  
14 injected into *yw;;nos-Cas9(III-attP2)* flies by BestGene. Full plasmid sequences and primers used  
15 to validate the insertion location by sequencing are included in Table S1.

16

### 17 Cell culture and transfection

18 BG3-c2 cells and S2 cells (*Drosophila* Genomics Resource Center) were cultured at 25°C in  
19 Schneider's medium with 10% FBS or M3+BPYE medium with 10% FBS, respectively. BG3  
20 medium was further supplemented with 10 µg/mL insulin. The MEGAscript T7 Kit (Thermo Fisher  
21 Scientific) was used to generate dsRNA, which was purified using NucAway Spin Columns  
22 (Thermo Fisher Scientific). The Amaxa Cell Line Nucleofector Kit V (Lonza) was used according  
23 to the manufacturer's protocol to transfect constructs and dsRNA into 5-10 million BG3 or S2 cells

1 using programs T30 or G30, respectively. Two  $\mu\text{g}$  of dsRNA targeting Shep or GFP was used to  
2 deplete Shep or serve as a control. One  $\mu\text{g}$  of each luciferase construct and 1  $\mu\text{g}$  of Renilla control  
3 construct were co-transfected into cells to perform luciferase assays. Experiments were performed 4  
4 d after transfection.

#### 6 Cloning of luciferase constructs

7 Luciferase cDNA was inserted between the XhoI and SpeI restriction sites of the pJET1.2 cloning  
8 vector. The 2 kb region upstream of *brat-A/E*, *brat-B/C*, or *brat-F* was amplified from Oregon-R  
9 genomic DNA and then inserted between the XhoI and EcoRI restriction sites upstream of the  
10 luciferase-encoding sequences. Candidate enhancer regions based on 4C-seq analysis were  
11 individually cloned and inserted upstream of the *brat-A/E*, *bratB/C*, or *brat-F* promoter at NotI  
12 restriction sites. Cloning primer sequences are listed in Table S1.

#### 14 Luciferase Assays

15 One and a half mL of cells from each transfection were spun at 600 xg for 10 min. Cell pellets were  
16 frozen at  $-80^{\circ}\text{C}$  until analysis. Cells were resuspended in 250  $\mu\text{L}$  nuclease-free water, and 75  $\mu\text{L}$   
17 were plated in triplicate in opaque 96-well plates. Then 75  $\mu\text{L}$  of Dual-Glo Reagent (Promega) was  
18 added to each well, and the plate was incubated for 10 min at RT. Firefly luminescence was  
19 measured using a Spectramax II Gemini EM plate reader (Molecular Devices). Next, 75  $\mu\text{L}$  of  
20 Dual-Glo Stop & Glo Reagent (Promega) was added to each well and incubated for 10 min at RT  
21 before measuring Renilla luminescence. Two to three biological replicates were performed per  
22 experiment.

23

1 Chromatin conformation capture (3C)

2 For each replicate, 20 brains were dissected in Schneider's medium containing 10% FCS and 10  
3  $\mu\text{g}/\text{mL}$  insulin. Formaldehyde was added to a final concentration of 2% and brains were fixed for 15  
4 min at RT, then quenched with 0.125 M glycine for 10 min, followed by two 10 min rinses with  
5 washing buffer (50 mM Tris, 10 mM EDTA, 0.5 mM EGTA, 0.25% Triton-X100). Fixed brains  
6 were stored in storage buffer (10 mM Tris-HCl pH=8, 1 mM EDTA, 0.5 mM EGTA) at  $-80^{\circ}\text{C}$  until  
7 all samples were pestle-homogenized in lysis buffer [10 mM NaCl, 0.2% NP-40, 10 mM Tris pH 8,  
8 and Mini Complete tablet (Roche)] and incubated at  $37^{\circ}\text{C}$  for 20 min. Nuclei were pelleted at 6,000  
9 xg for 5 min, and the incubation was repeated once more. Nuclei were washed with digestion buffer  
10 (ThermoFisher Scientific ER0932 plus 0.2% NP-40), pelleted at 6,000 xg for 5 min and incubated  
11 with digestion buffer (ThermoFisher Scientific ER0932 plus 0.2% NP-40, 0.1% SDS) at  $65^{\circ}\text{C}$  for  
12 30 min. Triton X-100 was added to a final concentration of 1%, and samples were further incubated  
13 at  $37^{\circ}\text{C}$  for 15 min. Ten percent of each sample was saved as an undigested control. Next, 200 U of  
14 BsRGI (ThermoFisher Scientific ER0932) was added to a final volume of 100  $\mu\text{L}$ , and digestion  
15 was incubated for 2 d at  $37^{\circ}\text{C}$ . The restriction enzyme was inactivated at  $65^{\circ}\text{C}$  for 20 min, and  
16 another 10% of the sample was saved as a digested control. The digested sample was diluted with  
17 400  $\mu\text{L}$  T4 ligation buffer (NEB, M0202, 1% Triton X-100) and incubated at  $37^{\circ}\text{C}$  for 30 min,  
18 followed by an overnight incubation at  $16^{\circ}\text{C}$  with 3  $\mu\text{L}$  T4 DNA ligase (NEB, M0202). Samples  
19 were purified with phenol-chloroform and used as 3C templates for Taqman-qPCR. The BAC  
20 CH321-86O1 (Chori) was used to generate 3C templates to normalize for primer efficiency, and  
21 primers targeting the *drl* locus were used to equalize loading across samples. Student's *t* test was  
22 performed at  $*p < 0.05$ . Sequences of the MGB (minor groove binder) Taqman probe, 3C primers,  
23 and loading control primers are included in Table S1.

1

## 2 4C-seq libraries

3 Generation of 4C-seq libraries in BG3 cells was performed using the brain 3C protocol except that  
4 BG3 cells were fixed with 1% formaldehyde for 10 min at RT, and the primary digestion enzyme  
5 used was Csp6I (ThermoFisher Scientific ER0211). Next, 3C templates were further processed  
6 according to a published 4C protocol<sup>31</sup> with DpnII (NEB R0543) as the secondary digestion  
7 enzyme. Libraries were sequenced at the NIDDK Genomics Core Facility on an Illumina HiSeq  
8 2500. Primers used to amplify 4C-seq libraries are documented in Table S1.

9

## 10 4C-seq analyses

11 Reads from the 4C assay were aligned to the dm6 genome using bowtie2 v2.3.5 with default  
12 parameters. Subsequent sam files were sorted and converted into bam files using the Samtools v1.9  
13 view and sort commands, respectively. Sorted bam files were then used to perform the 4C-seq  
14 analysis with the FourCSeq v1.18.0 software package. Next, 4C-seq peak identification was  
15 performed by creating two dataframes containing the following metadata information: restriction  
16 enzymes, sequencing primers, reference genome ID, replicate information, viewpoint location and  
17 sorted bam file names. This metadata was used to create the *in silico* digested reference genome,  
18 extract the location of the viewpoint, and map its reads to both the reference genome and the  
19 fragment reference. Mapped reads were then counted using the ‘countFragmentOverlaps’ command  
20 in a strand specific manner. Because the restriction enzymes had already been trimmed, the *trim*  
21 parameter was set to 0, and the minimum-mapping quality was set to 20. Counts from both left and  
22 right fragment ends were combined using the ‘combineFragEnds’ command. Spikes and PCR  
23 artifacts were removed using ‘smoothCounts’, and z-scores were calculated for potential peaks



1 along the default distance from the viewpoint using ‘getZScores’. Lastly, differential interacting  
2 fragments were identified using the ‘addPeaks’ function if at least one replicate had an adjusted *p*  
3 value of 0.01 and both replicates had a z-score larger than 3.

4

#### 5 FACS and ATAC-seq libraries

6 A published FACS procedure was used to dissociate and select GFP positive cells<sup>11</sup>. Cells were  
7 sorted on a FACSAria II machine at the Flow Cytometry Core of the National Heart, Lung and  
8 Blood Institute. Omni-ATAC-seq libraries were generated according to a detailed protocol<sup>16</sup> with  
9 minor adjustments. Specifically, 2 x 10<sup>5</sup> sorted GFP-positive neurons were used for each of three  
10 biological replicates, and DNA was phenol-chloroform extracted. Eleven total PCR cycles were  
11 performed to amplify libraries, which were subsequently double size-selected with AMPure XP  
12 beads (first with 0.6x volume, then with 1.2x volume) (Beckman Coulter). Finally, 50 bp paired-end  
13 sequencing was performed at the NIDDK Genomics Core Facility on an Illumina NextSeq 550 with  
14 the High Output mode.

15

#### 16 ATAC-seq computational analyses

17 Adapter sequences were trimmed from reads with cutadapt (v2.3; -a  
18 CTGTCTCTTATACACATCTCCGAGCCCACGAGAC -A  
19 CTGTCTCTTATACACATCTGACGCTGCCGACGA --minimum-length 18) and aligned to  
20 Flybase release dm6 reference with bowtie2 (v2.3.5; --very-sensitive, pair-end mode)<sup>32</sup>. Reads were  
21 depleted for those aligned to mitochondria (egrep -v chrM) and for multi-mapped reads with  
22 samtools (v1.9)<sup>33</sup>. Uniquely mapped reads were further depleted for PCR duplicates with picard  
23 (MarkDuplicates REMOVE\_DUPLICATES=true) and computationally size-selected for inserts

1 <150 bp to exclude nucleosome-related reads. ATAC-seq peak calling was performed with MACS2  
2 (v2.2.6; pair-end mode -f BAMPE)<sup>34</sup>, and differential accessibility was called with the R package  
3 DiffBind v2.6.6 (edgeR, FDR<0.1 and lfc>0.3). Motif enrichment analyses were performed with  
4 AME 5.3.3<sup>35</sup> and STREME 5.3.3<sup>36</sup>, and only motifs identified by both algorithms with known  
5 binding factors were reported.

6

### 7 CUT&Tag libraries and analyses

8 After FACS sorting, collected neurons were used directly to generate CUT&Tag libraries following  
9 a protocol established by the Henikoff group (<https://dx.doi.org/10.17504/protocols.io.bcuhwt6>)  
10 with minor changes. Specifically,  $7.5 \times 10^4$  sorted GFP-positive neurons were used for each of three  
11 biological replicates without crosslinking. The Tn5 was purchased from Epiccypher (15-1017) and  
12 used at 1:20. The primary antibodies used were H3K27me3 (Cell Signaling Technology 9733),  
13 H3K4me1 (Abcam ab8895), and H3K27ac (Abcam ab4729). Sixteen total PCR cycles were  
14 performed to amplify libraries, which were re-purified (using 1.1x volume of AMPure XP beads)  
15 after pooling to remove primer dimers. Then 50 bp paired-end sequencing was completed at the  
16 NIDDK Genomics Core Facility on a NextSeq 550 using high-output. Computational analyses of  
17 CUT&Tag data were performed with the same pipeline used for ATAC-seq except that there was no  
18 computational size-selection of sequencing reads, and peaks were called by MACS2 (v2.2.6) in  
19 broad mode.

20

### 21 Immunostaining and imaging

1 Immunostaining was performed as previously described<sup>11</sup>. The GFP primary antibody  
2 (ThermoFisher A10262) was used at 1:8,000, and guinea pig anti-Shep<sup>11</sup> was used at 1:1,000.  
3 Images were taken as maximum-intensity z-series projections with a Zeiss780 confocal microscope.

4

#### 5 Statistics

6 All experiments were performed using three biological replicates unless noted. The  $p$  values of  
7 Fisher's exact tests were calculated with R v3.6.1 and reported as two-tailed values at \*\*\* $p < 0.001$ ,  
8 \*\* $p < 0.01$  and \* $p < 0.05$ . Averaged values are reported as mean $\pm$ sem unless otherwise noted.

9

## 1 **Acknowledgements**

2 We thank S. Wang for assistance with custom MA plots; L. Benner for guidance on CRISPR; and  
3 A. Dean, G. Blobel, and members of the Lei laboratory for comments on the manuscript.

## 4 **Funding**

5 This work was funded by the Intramural Program of the National Institute of Diabetes and Digestive  
6 and Kidney Diseases, National Institutes of Health (DK015602 to E.P.L.) and the Pathway to  
7 Independence Award (K99HD097308-01A1 to D.C.).

## 8 **Author contributions**

9 Conceptualization: D.C., C.E.M., E.P.L.; Data Curation: D.C., C.E.M., B.R.; Formal Analysis:  
10 D.C., C.E.M., B.R.; Funding acquisition: E.P.L., D.C.; Investigation: D.C., C.E.M.; Methodology:  
11 D.C., C.E.M., B.R.; Project administration: D.C., E.P.L.; Resources: E.P.L.; Software: D.C., B.R.;  
12 Supervision: E.P.L.; Validation: D.C., C.E.M., E.P.L.; Visualization: D.C., C.E.M., B.R.; Writing –  
13 original draft: D.C.; Writing – review & editing: D.C., C.E.M., B.R., E.P.L.

## 14 **Competing interests**

15 Authors declare no competing interests.

## 16 **Data and materials availability**

17 The 4C-seq, ATAC-seq, CUT&Tag, and ChIP-seq data have been deposited in the Gene Expression  
18 Omnibus database under accession number GSE154645; All data are available in the main text or  
19 supplementary materials.

20

21

1 **Fig. 1.**

**A**

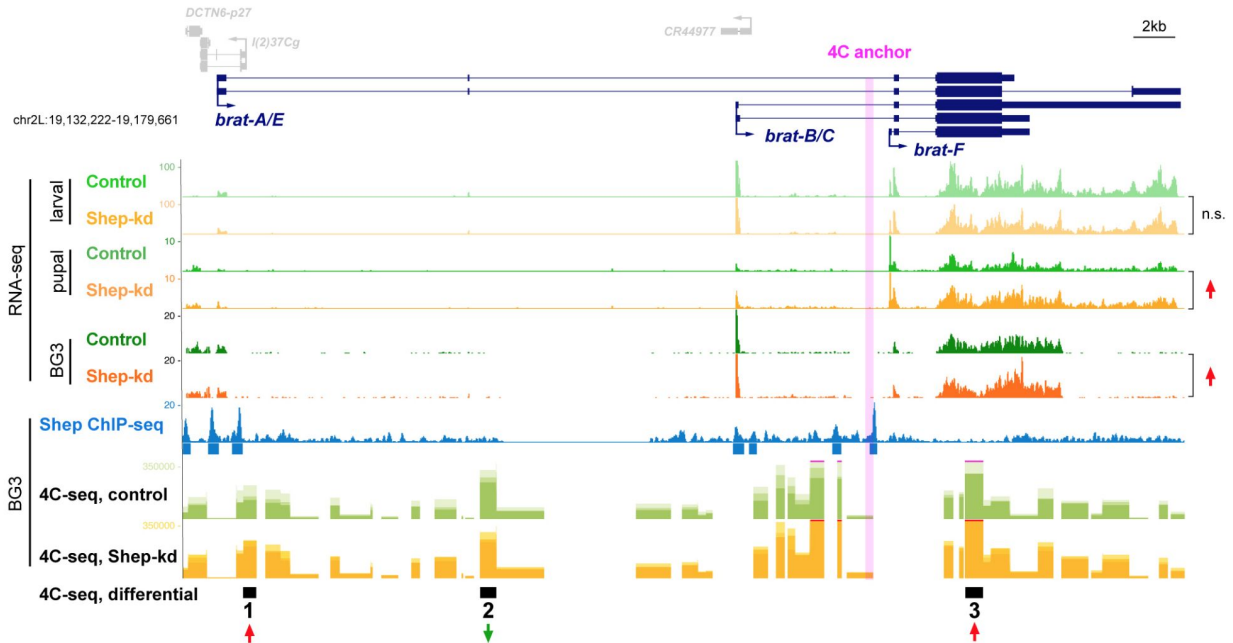

**B**

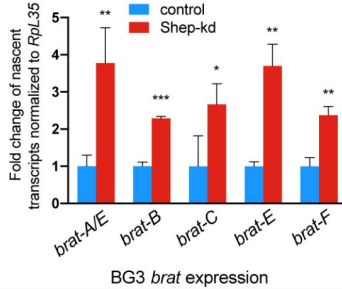

**C**

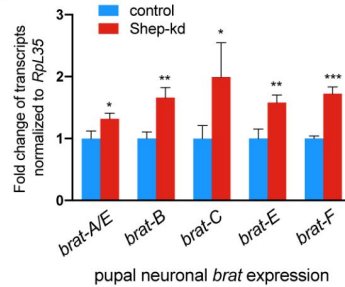

**D**

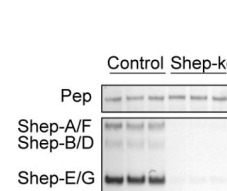

**E**

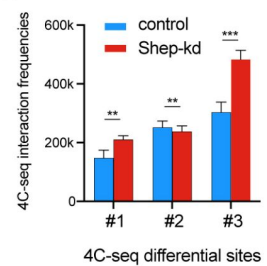

2

3 **Fig. 1. Shep inhibits *brat* expression and *brat-F* promoter looping with proximal genomic**  
 4 **regions. (A)** RNA-seq analysis of control versus Shep-depleted larval neurons, pupal neurons  
 5 (FDR=1.6e-3, fold change=1.4), and BG3 cells (FDR=5.6e-2, fold change=1.2) at the *brat* locus  
 6 (top). Note different scales of RNA-seq tracks between larval and pupal neurons, indicating a  
 7 dramatic decrease in *brat* expression during neuronal remodeling. ChIP-seq profile of Shep in BG3  
 8 cells with called peaks indicated below (middle). BG3 cell 4C-seqs using the *brat-F* promoter as an  
 9 anchor (pink shading) identifies three regions (red and green arrows) with differential (FDR=7.0e-3,  
 10 5.6e-3 and 1.4e-4, respectively; fold change=1.3, 0.8 and 1.3, respectively) interaction frequencies

1 upon Shep depletion (bottom). Note that only these three regions pass the FDR < 0.01 threshold. **(B)**  
2 Shep depletion in BG3 cells leads to increased transcription of all *brat* isoforms. Nascent RNA was  
3 quantified by EU-qPCR using isoform-specific primers. **(C)** Shep depletion leads to increased  
4 steady-state expression of all *brat* isoforms in sorted pupal neurons. **(D)** Efficient Shep protein  
5 depletion achieved by dsRNA treatment in BG3 cells. Pep served as a loading control for Western  
6 blotting. **(E)** Graph showing actual looping frequency measured by 4C-seq in panel A is displayed  
7 specifically for the three regions displaying differential interaction that pass the statistical  
8 significance threshold.

1 **Fig. 2.**

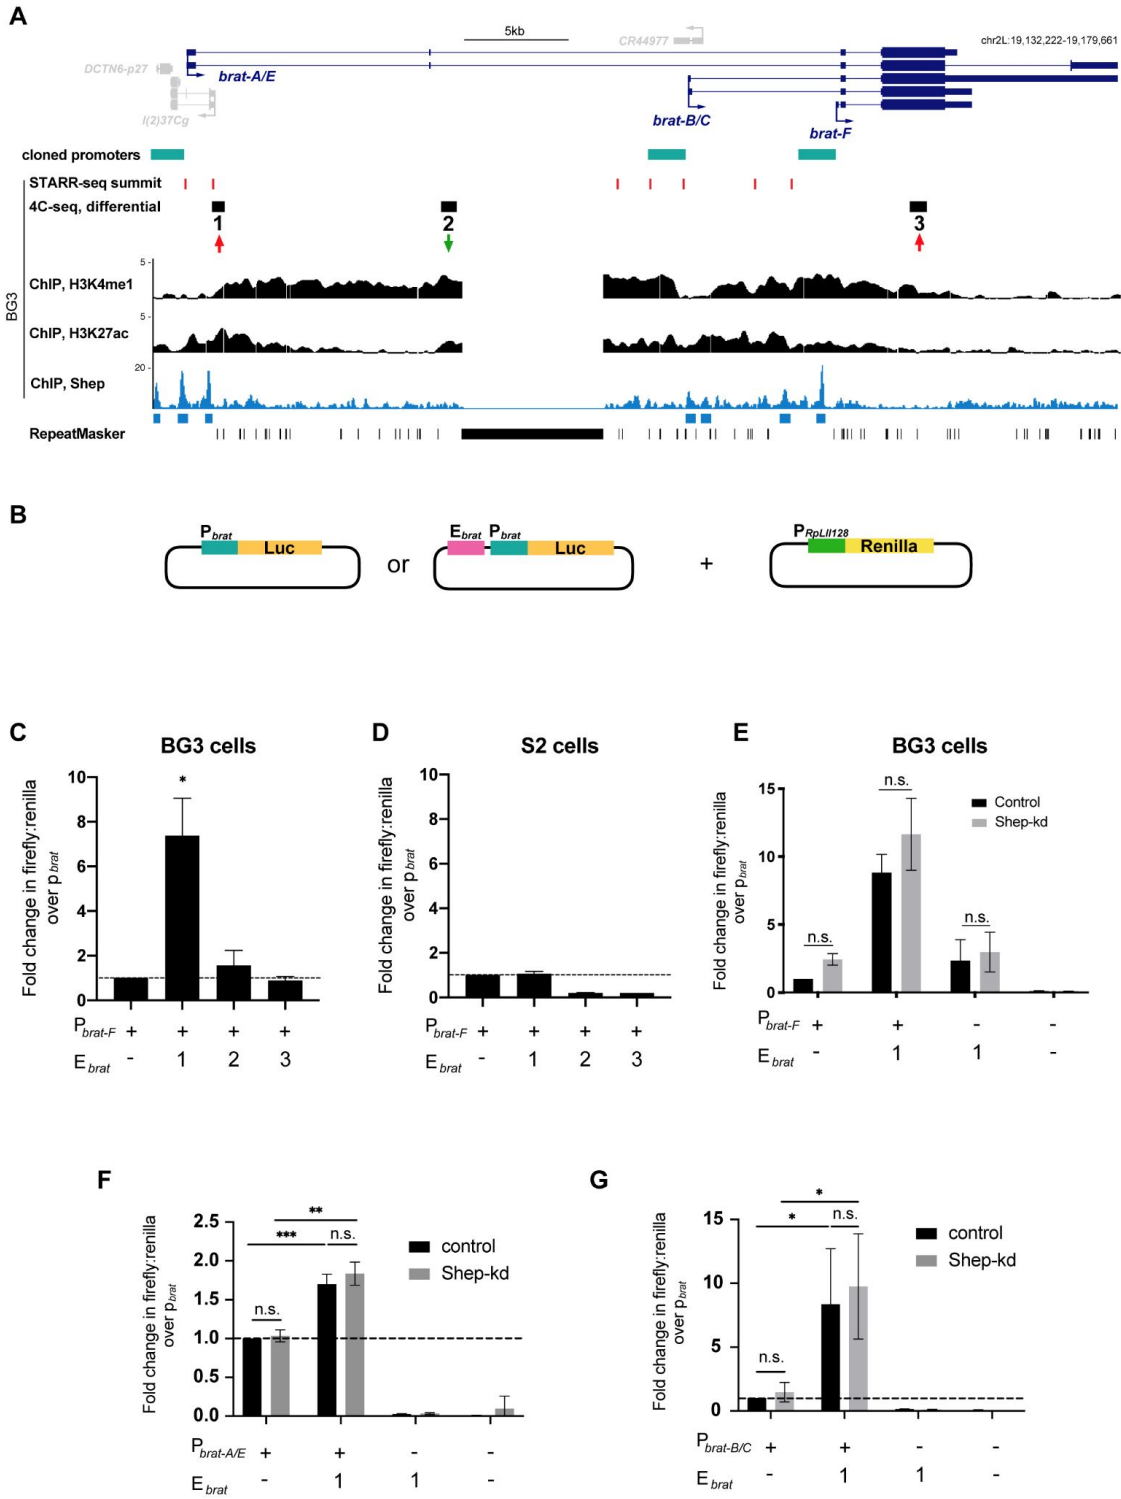

2

1 **Fig. 2. Region 1 is a neural-specific enhancer, and Shep does not directly repress *brat***  
2 **enhancer or promoter activities. (A)** ChIP-seq of H3K4me1, H3K27ac, and Shep along with  
3 STARR-seq summits at the three 4C-seq differential regions in BG3 cells (red and green arrows).  
4 The *brat* promoters are defined as the 2 kb region upstream of the transcription start site of *brat*  
5 isoforms and are indicated by teal bars. **(B)** Luciferase constructs with *brat-F* promoter and/or  
6 putative enhancer region co-transfected along with a Renilla construct with *RpL1128* promoter,  
7 which serves as a transfection control for enhancer reporter assays. **(C-D)** Renilla-normalized  
8 luciferase expression driven by the *brat-F* promoter in BG3 or S2 cells. Region 1, but not regions 2  
9 and 3, enhances luciferase expression in BG3 but not S2 cells. **(E)** Normalized luciferase expression  
10 in control or Shep-depleted BG3 cells. Expression of region 1 enhancer and/or *brat-F* promoter  
11 constructs are unaffected by Shep depletion. Student's *t* test. **(F)** Fold change of Renilla-normalized  
12 luciferase expression over *brat-A/E* promoter driven by region 1 or *brat-A/E* promoter alone or  
13 region 1 alone in BG3 cells. Cells were co-transfected with GFP (control) or *shep* dsRNA. **(G)**  
14 Same assay as (F) for *brat-B/C* promoter. Student's *t* test, \* $p < 0.05$ , \*\* $p < 0.01$ , \*\*\* $p < 0.001$ . Average  
15 values are reported as mean $\pm$ sd for all luciferase assays.  
16



1 **Fig. 3.**

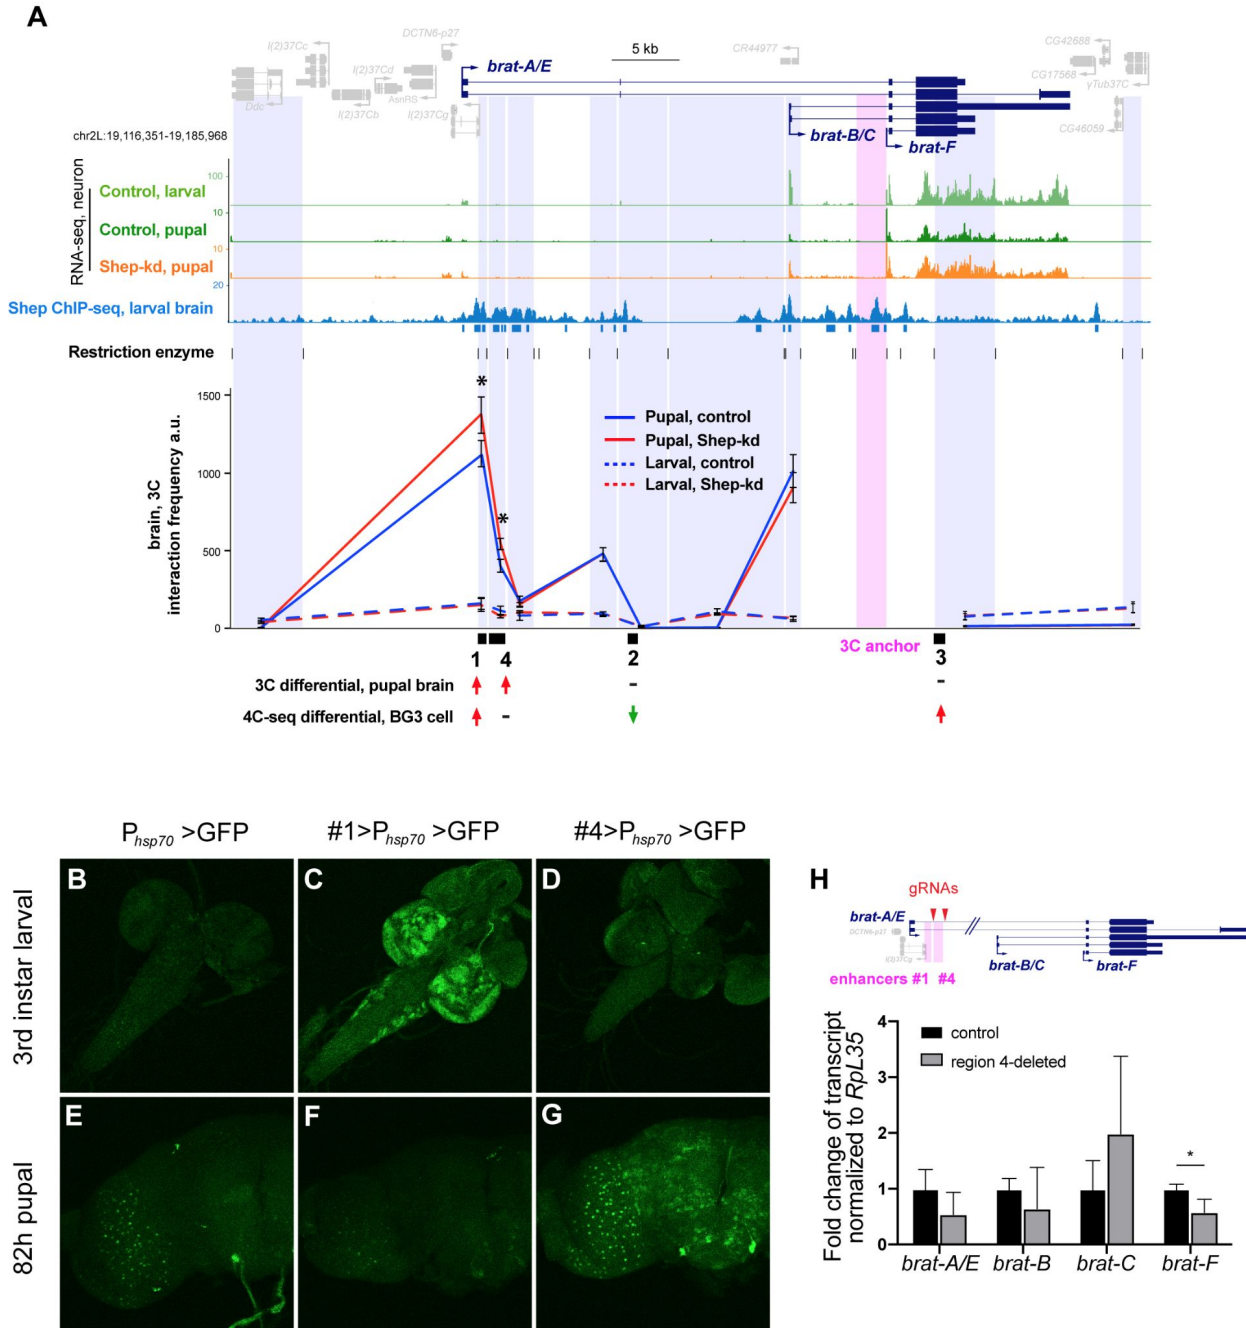

2  
3 **Fig. 3. Shep inhibits *brat* E-P looping in a stage-specific manner.** (A) 3C interaction frequencies  
4 in control (blue) or Shep-depleted (red), larval (dashed) or pupal (solid) brains using the *brat-F*  
5 promoter as an anchor (pink shading). Digested genomic fragments for 3C quantification are  
6 labeled in purple shading. Normalized interaction frequencies in arbitrary units are analyzed by

1 Student's *t* test. Statistical significance is presented as  $*p < 0.05$  for three biological replicates. **(B-G)**  
2 Regions 1 and 4 harbor temporally-regulated enhancer activities. GFP reporter expression driven by  
3 the minimal *hsp70* promoter with or without candidate enhancer regions was visualized by  
4 immunostaining larval and pupal brains with anti-GFP. Note leaky GFP expression driven by *hsp70*  
5 promoter in pupal brains (E). All flies were grown at 25°C. **(H)** Quantification of steady state *brat*  
6 expression in pupal brains of homozygous CRISPR-deletion of region #4 mutants by RT-qPCR.  
7 The gRNAs used to target region 4 labeled with arrow heads.  
8

1 **Fig. 4.**

**A**

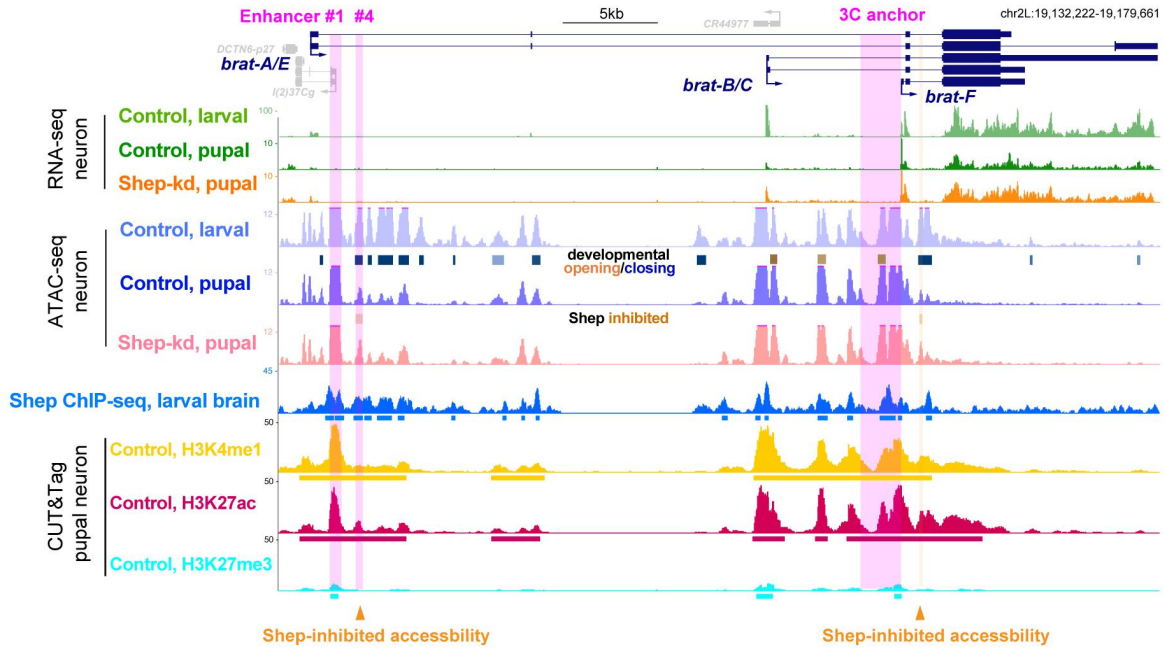

**B**

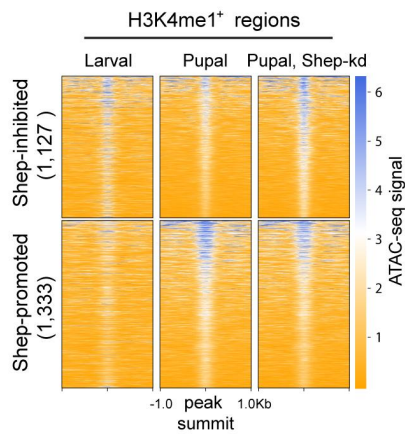

**C**

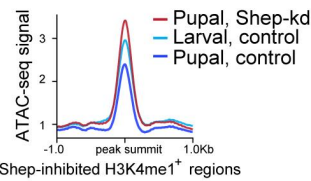

**D**

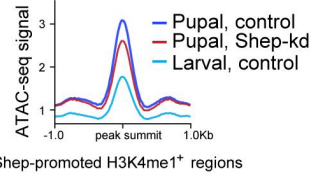

**E**

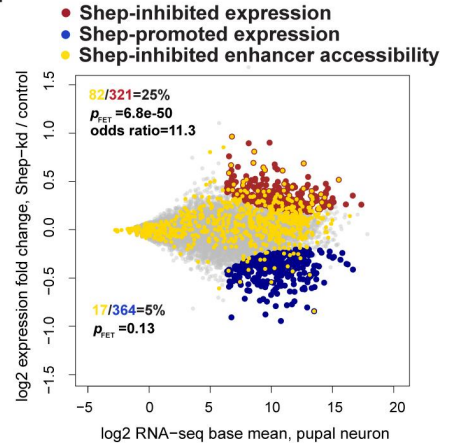

2

3 **Fig. 4. Shep mainly represses enhancer accessibility in pupal neurons genome-wide. (A)**

4 ATAC-seq profiles of control larval, control pupal, and Shep-depleted pupal neurons at the *brat*  
 5 locus. Called differentially accessible regions that open (orange) or close (blue) between control  
 6 larvae and pupae are indicated. Only two accessible regions change (open) after Shep depletion in  
 7 pupal neurons (orange arrow heads and shading; FDR=0.07 and fold change=1.3 for both regions).

8 CUT&Tag signals of H3K4me1, H3K27ac, and H3K27me3 in sorted control pupal neurons are

1 shown in yellow, red, and cyan. **(B)** ATAC-seq signals are shown for Shep-regulated ATAC-seq  
2 peak regions in control versus Shep-depleted pupal neurons that are also marked by CUT&Tag  
3 signal for H3K4me1 in sorted control pupal neurons. Corresponding signals in control larval  
4 neurons are also shown. **(C-D)** Average ATAC-seq signals across regions in B are shown. **(E)** Shep  
5 inhibits enhancer accessibility to repress gene expression in sorted pupal neurons. Genes  
6 corresponding to Shep-regulated enhancer accessibility are labeled in gold and overlaid with genes  
7 for which expression is Shep-inhibited in red or Shep-promoted in blue. Numbers of genes in each  
8 group are indicated and colored accordingly, and FET is reported for indicated colored groups.  
9

## 1 References

- 2 1 Ghavi-Helm, Y. *et al.* Enhancer loops appear stable during development and are associated with paused  
3 polymerase. *Nature* **512**, 96-100, doi:10.1038/nature13417 (2014).
- 4 2 Noordermeer, D. *et al.* The dynamic architecture of Hox gene clusters. *Science* **334**, 222-225,  
5 doi:10.1126/science.1207194 (2011).
- 6 3 Deng, W. *et al.* Controlling long-range genomic interactions at a native locus by targeted tethering of a looping  
7 factor. *Cell* **149**, 1233-1244, doi:10.1016/j.cell.2012.03.051 (2012).
- 8 4 Kim, J. H. *et al.* LADL: light-activated dynamic looping for endogenous gene expression control. *Nat Methods*  
9 **16**, 633-639, doi:10.1038/s41592-019-0436-5 (2019).
- 10 5 Deng, W. *et al.* Reactivation of developmentally silenced globin genes by forced chromatin looping. *Cell* **158**,  
11 849-860, doi:10.1016/j.cell.2014.05.050 (2014).
- 12 6 Chopra, V. S., Kong, N. & Levine, M. Transcriptional repression via antilooping in the *Drosophila* embryo.  
13 *Proc Natl Acad Sci U S A* **109**, 9460-9464, doi:10.1073/pnas.1102625108 (2012).
- 14 7 Kim, Y. H. *et al.* Rev-erbalpha dynamically modulates chromatin looping to control circadian gene  
15 transcription. *Science* **359**, 1274-1277, doi:10.1126/science.aao6891 (2018).
- 16 8 McClellan, M. J. *et al.* Modulation of enhancer looping and differential gene targeting by Epstein-Barr virus  
17 transcription factors directs cellular reprogramming. *PLoS Pathog* **9**, e1003636,  
18 doi:10.1371/journal.ppat.1003636 (2013).
- 19 9 Chen, D., Brovkina, M., Matzat, L. H. & Lei, E. P. Shep RNA-Binding Capacity Is Required for Antagonism  
20 of gypsy Chromatin Insulator Activity. *G3 (Bethesda)* **9**, 749-754, doi:10.1534/g3.118.200923 (2019).
- 21 10 Matzat, L. H., Dale, R. K., Moshkovich, N. & Lei, E. P. Tissue-specific regulation of chromatin insulator  
22 function. *PLoS Genet* **8**, e1003069, doi:10.1371/journal.pgen.1003069 (2012).
- 23 11 Chen, D., Dale, R. K. & Lei, E. P. Shep regulates *Drosophila* neuronal remodeling by controlling transcription  
24 of its chromatin targets. *Development* **145**, doi:10.1242/dev.154047 (2018).
- 25 12 Chen, D., Qu, C., Bjorum, S. M., Beckingham, K. M. & Hewes, R. S. Neuronal remodeling during  
26 metamorphosis is regulated by the alan shepard (shep) gene in *Drosophila melanogaster*. *Genetics* **197**, 1267-  
27 1283, doi:10.1534/genetics.114.166181 (2014).
- 28 13 Olesnický, E. C., Bhogal, B. & Gavis, E. R. Combinatorial use of translational co-factors for cell type-specific  
29 regulation during neuronal morphogenesis in *Drosophila*. *Dev Biol* **365**, 208-218,  
30 doi:10.1016/j.ydbio.2012.02.028 (2012).
- 31 14 Celniker, S. E. *et al.* Unlocking the secrets of the genome. *Nature* **459**, 927-930, doi:10.1038/459927a (2009).
- 32 15 Yanez-Cuna, J. O. *et al.* Dissection of thousands of cell type-specific enhancers identifies dinucleotide repeat  
33 motifs as general enhancer features. *Genome Res* **24**, 1147-1156, doi:10.1101/gr.169243.113 (2014).
- 34 16 Corces, M. R. *et al.* An improved ATAC-seq protocol reduces background and enables interrogation of frozen  
35 tissues. *Nat Methods* **14**, 959-962, doi:10.1038/nmeth.4396 (2017).
- 36 17 Ohtsuki, S. & Levine, M. GAGA mediates the enhancer blocking activity of the eve promoter in the  
37 *Drosophila* embryo. *Genes Dev* **12**, 3325-3330, doi:10.1101/gad.12.21.3325 (1998).
- 38 18 Schweinsberg, S. *et al.* The enhancer-blocking activity of the Fab-7 boundary from the *Drosophila* bithorax  
39 complex requires GAGA-factor-binding sites. *Genetics* **168**, 1371-1384, doi:10.1534/genetics.104.029561  
40 (2004).
- 41 19 Kaczynski, J., Cook, T. & Urrutia, R. Sp1- and Kruppel-like transcription factors. *Genome Biol* **4**, 206,  
42 doi:10.1186/gb-2003-4-2-206 (2003).
- 43 20 Chen, D., Gu, T., Pham, T. N., Zachary, M. J. & Hewes, R. S. Regulatory Mechanisms of Metamorphic  
44 Neuronal Remodeling Revealed Through a Genome-Wide Modifier Screen in *Drosophila melanogaster*.  
45 *Genetics* **206**, 1429-1443, doi:10.1534/genetics.117.200378 (2017).
- 46 21 Soruco, M. M. *et al.* The CLAMP protein links the MSL complex to the X chromosome during *Drosophila*  
47 dosage compensation. *Genes Dev* **27**, 1551-1556, doi:10.1101/gad.214585.113 (2013).
- 48 22 Moshkovich, N. *et al.* RNAi-independent role for Argonaute2 in CTCF/CP190 chromatin insulator function.  
49 *Genes Dev* **25**, 1686-1701, doi:10.1101/gad.16651211 (2011).
- 50 23 Dale, R. K., Matzat, L. H. & Lei, E. P. metaseq: a Python package for integrative genome-wide analysis  
51 reveals relationships between chromatin insulators and associated nuclear mRNA. *Nucleic Acids Res* **42**, 9158-  
52 9170, doi:10.1093/nar/gku644 (2014).
- 53 24 Yaniv, S. P. & Schuldiner, O. A fly's view of neuronal remodeling. *Wiley Interdiscip Rev Dev Biol* **5**, 618-635,  
54 doi:10.1002/wdev.241 (2016).

- 1 25 Alyagor, I. *et al.* Combining Developmental and Perturbation-Seq Uncovers Transcriptional Modules  
2 Orchestrating Neuronal Remodeling. *Dev Cell* **47**, 38-52 e36, doi:10.1016/j.devcel.2018.09.013 (2018).
- 3 26 Frank, C. L. *et al.* Regulation of chromatin accessibility and Zic binding at enhancers in the developing  
4 cerebellum. *Nat Neurosci* **18**, 647-656, doi:10.1038/nn.3995 (2015).
- 5 27 Ghavi-Helm, Y. *et al.* Highly rearranged chromosomes reveal uncoupling between genome topology and gene  
6 expression. *Nat Genet* **51**, 1272-1282, doi:10.1038/s41588-019-0462-3 (2019).
- 7 28 Reddington, J. P. *et al.* Lineage-Resolved Enhancer and Promoter Usage during a Time Course of  
8 Embryogenesis. *Dev Cell* **55**, 648-664 e649, doi:10.1016/j.devcel.2020.10.009 (2020).
- 9 29 Nord, A. S. & West, A. E. Neurobiological functions of transcriptional enhancers. *Nat Neurosci* **23**, 5-14,  
10 doi:10.1038/s41593-019-0538-5 (2020).
- 11 30 Schachtner, L. T. *et al.* Drosophila Shep and C. elegans SUP-26 are RNA-binding proteins that play diverse  
12 roles in nervous system development. *Dev Genes Evol* **225**, 319-330, doi:10.1007/s00427-015-0514-3 (2015).
- 13 31 Nazer, E., Dale, R. K., Chinen, M., Radmanesh, B. & Lei, E. P. Argonaute2 and LaminB modulate gene  
14 expression by controlling chromatin topology. *PLoS Genet* **14**, e1007276, doi:10.1371/journal.pgen.1007276  
15 (2018).
- 16 32 Langmead, B. & Salzberg, S. L. Fast gapped-read alignment with Bowtie 2. *Nat Methods* **9**, 357-359,  
17 doi:10.1038/nmeth.1923 (2012).
- 18 33 Li, H. *et al.* The Sequence Alignment/Map format and SAMtools. *Bioinformatics* **25**, 2078-2079,  
19 doi:10.1093/bioinformatics/btp352 (2009).
- 20 34 Zhang, Y. *et al.* Model-based analysis of ChIP-Seq (MACS). *Genome Biol* **9**, R137, doi:10.1186/gb-2008-9-9-  
21 r137 (2008).
- 22 35 McLeay, R. C. & Bailey, T. L. Motif Enrichment Analysis: a unified framework and an evaluation on ChIP  
23 data. *BMC Bioinformatics* **11**, 165, doi:10.1186/1471-2105-11-165 (2010).
- 24 36 Bailey, T. L. STREME: Accurate and versatile sequence motif discovery. *Bioinformatics*,  
25 doi:10.1093/bioinformatics/btab203 (2021).  
26
